# Supplementary material for: Kindlin-2 deletion in osteoprogenitors causes severe chondrodysplasia and low-turnover osteopenia in mice
Source: PubMed Central journal article supplement — J Orthop Translat. 2021 Sep 27;32:41–8. doi: 10.1016/j.jot.2021.08.005 (PMC8639803; doi:10.1016/j.jot.2021.08.005), 2021-09-27
Supplement: mmc1.pdf [file mmc1.pdf]

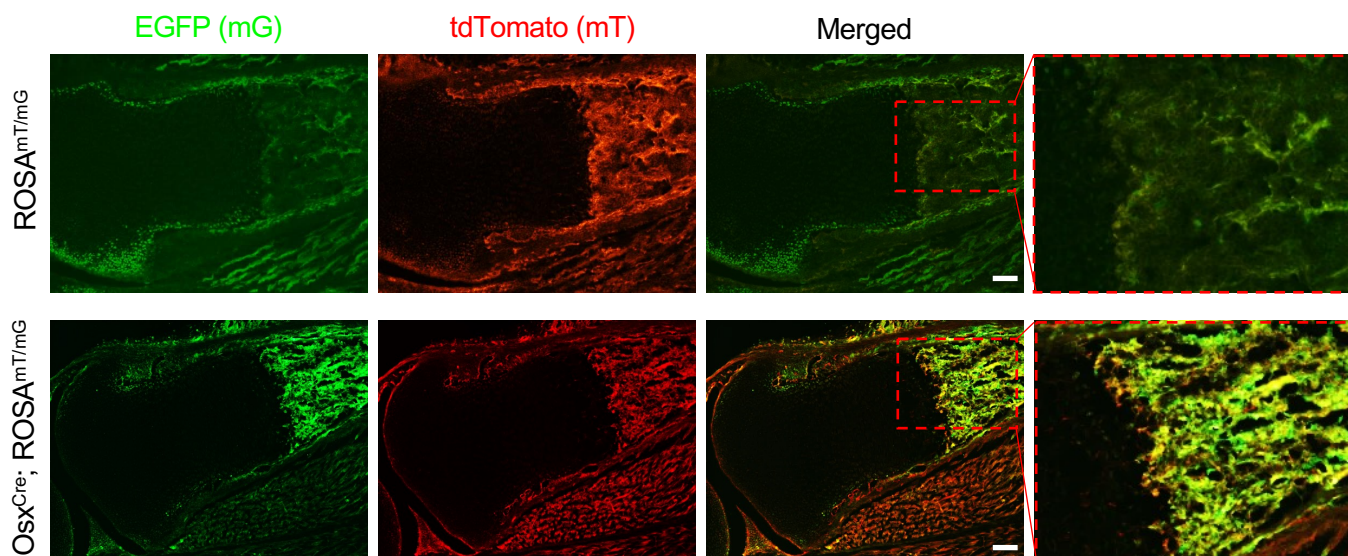

**Supplementary Figure 1. Cre recombination activity of *Osx*<sup>Cre</sup> in neonatal bone.** Representative images showing the expression of EGFP (green) and tdTomato (red) fluorescence in neonatal bone of *Osx*<sup>Cre</sup>; *ROSA*<sup>mT/mG</sup> reporter mice. *ROSA*<sup>mT/mG</sup> mice were used as negative control. EGFP expression indicates the Cre recombination. Higher magnification images of red dashed boxed areas are shown in right panels. Scale bar, 40  $\mu$ m.

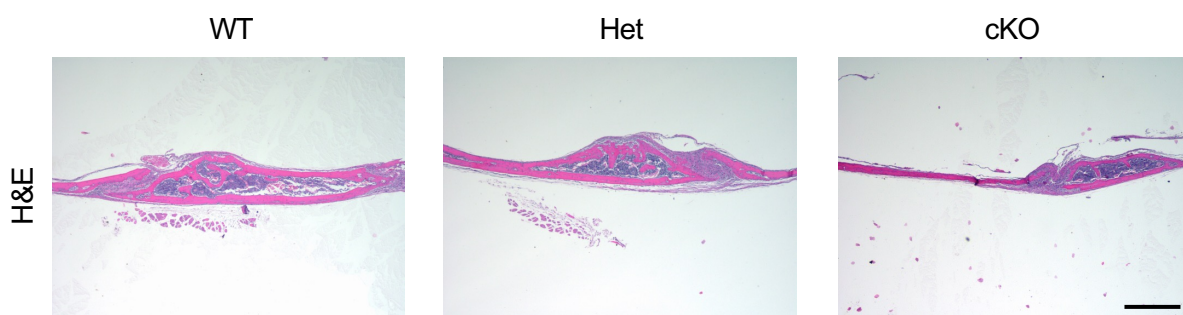

**Supplementary Figure 2. *Kindlin-2*<sup>fl/fl</sup>; *Osx*<sup>Cre</sup> mice display decreased bone mass and intramembranous ossification in calvariae.** (a) Haematoxylin and eosin (H&E) staining of calvariae sections from WT, Het and cKO mice at P35. Scale bar, 40  $\mu$ m.

| Gene         | Forward               | Reverse                |
|--------------|-----------------------|------------------------|
| <i>Osx</i>   | ATGGCGTCCTCTCTGCTTG   | TGAAAGGTCAGCGTATGGCTT  |
| <i>Runx2</i> | AACGATCTGAGATTTGTGGGC | CCTGCGTGGGATTTCTTGGTT  |
| <i>Alp</i>   | CCAACCTTTTTGTGCCAGAGA | GGCTACATTGGTGTGAGCTTTT |
| <i>Bsp</i>   | TCAGCATTTTGGGA TGGCC  | GAGGTTGTTGTCTTCGAGGT   |
| <i>Ocn</i>   | AGGGAGGATCAAGTCCCG    | GAACAGACTCCGGCGCTA     |

**Supplementary Table 1: Primer information**
